# Supplementary material for: Self-Assembled Polyaniline/Ti3C2Tx Nanocomposites for High-Performance Electrochromic Films
Source: MDPI journal article supplement (doi:10.3390/nano11112956), 2021-11-04
Supplement: s1 [file s1]

Supplementary

# Self-Assembled Polyaniline/Ti<sub>3</sub>C<sub>2</sub>T<sub>x</sub> Nanocomposites for High-Performance Electrochromic Films

Tao Lin <sup>1,2,3</sup>, Wenlong Liu <sup>1,4,\*</sup>, Bin Yan <sup>2</sup>, Jing Li <sup>4</sup>, Yi Lin <sup>2</sup>, Yinghui Zhao <sup>2</sup>, Zheng Shi <sup>2</sup> and Sheng Chen <sup>2,\*</sup>

<sup>1</sup> School of Mechanical Engineering, Chengdu University, Chengdu 610106, China; lintao@stu.cdu.edu.cn

<sup>2</sup> College of Biomass Science and Engineering, Sichuan University, Chengdu 610065, China; yanbinscu@126.com (B.Y.); linasdn@126.com (Y.L.); yh18428367250@163.com (Y.Z.); drshiz1002@hotmail.com (Z.S.)

<sup>3</sup> Advanced Materials Deformation and Damage from Multi-Scale, Chengdu University, Chengdu 610106, China;

<sup>4</sup> College of Food and Biological Engineering, Chengdu University, Chengdu 610106, China; lijing@cdu.edu.cn

\* Correspondence: liuwenlong\_666@126.com (W.L.); chensheng@scu.edu.cn (S.C.)

## Information Figures

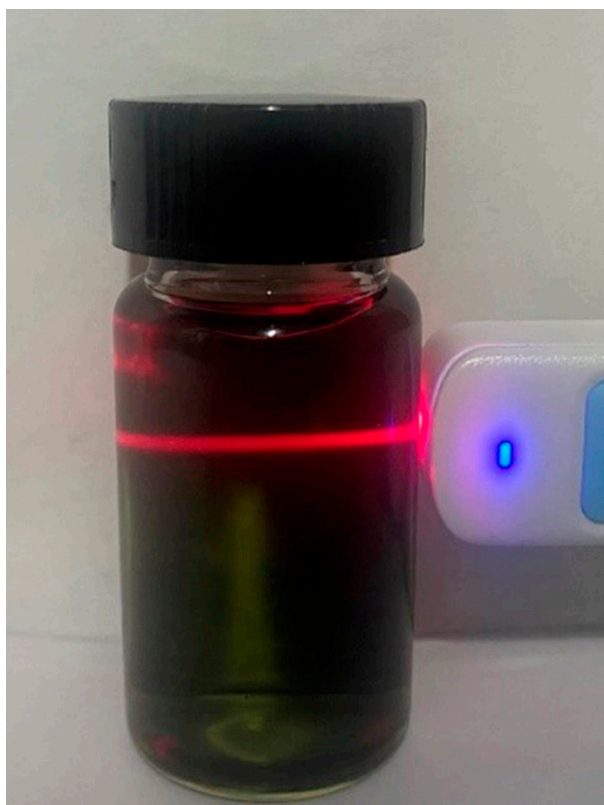

**Figure S1.** Tyndall phenomenon of MXene diluted solution.

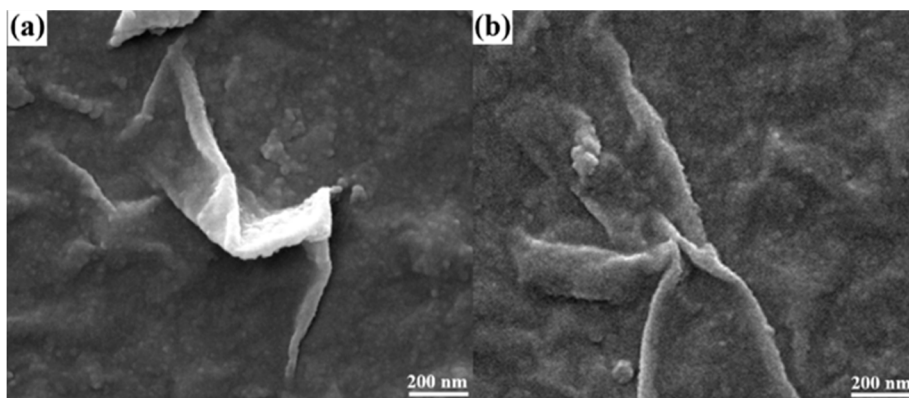

**Figure S2.** (a) and (b) The SEM images of exfoliated  $\text{Ti}_3\text{C}_2\text{T}_x$  MXene.

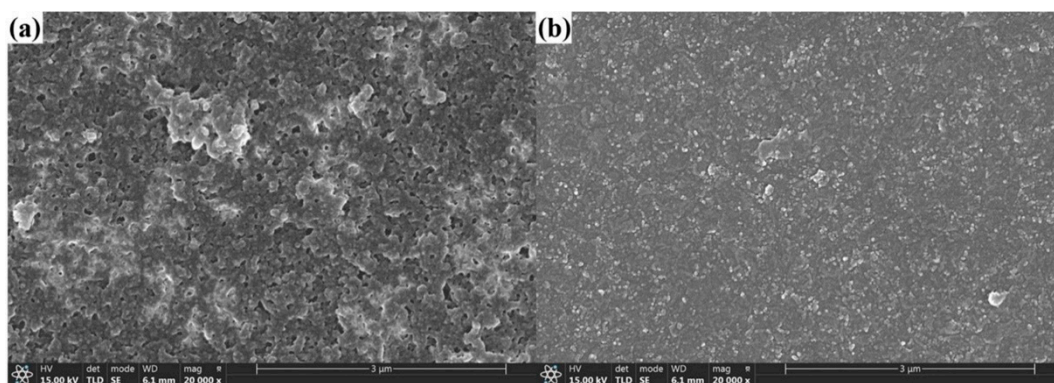

**Figure S3.** (a) and (b) SEM images of spray-coated films, (a) MXene; (b) PANI.

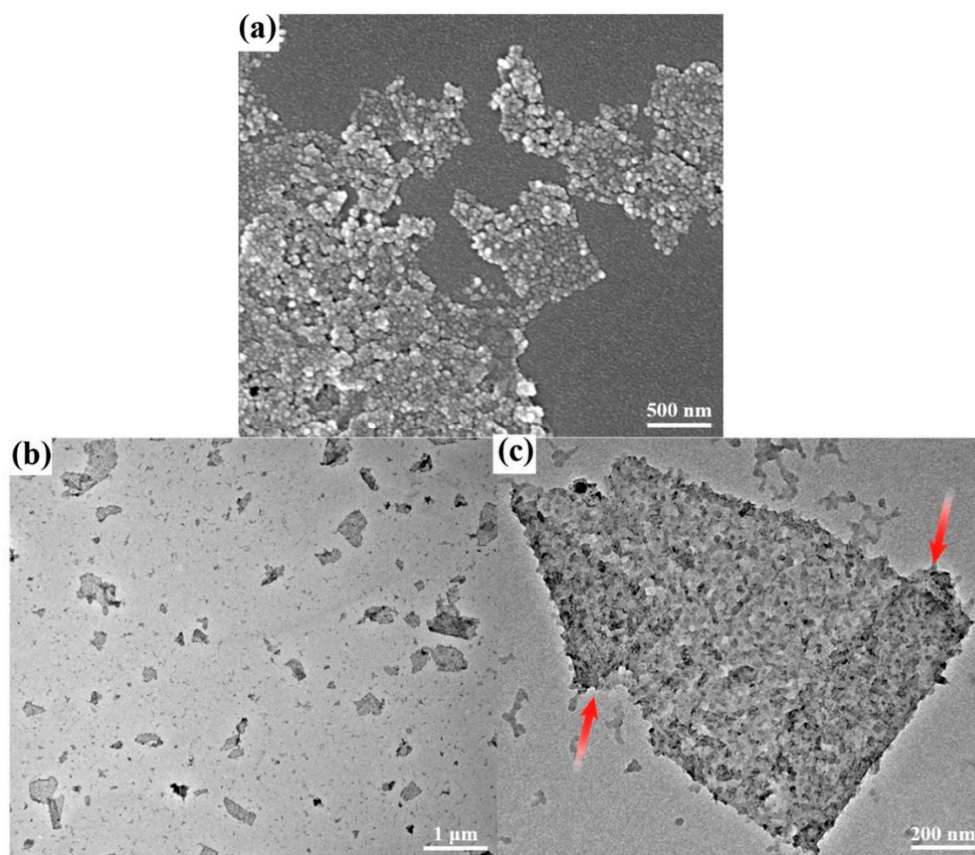

**Figure S4.** (a) SEM image of PANI/MXene film. (b) and (c) TEM images of the PANI/MXene nanocomposite with different magnifications. Arrow points to the fold positions.

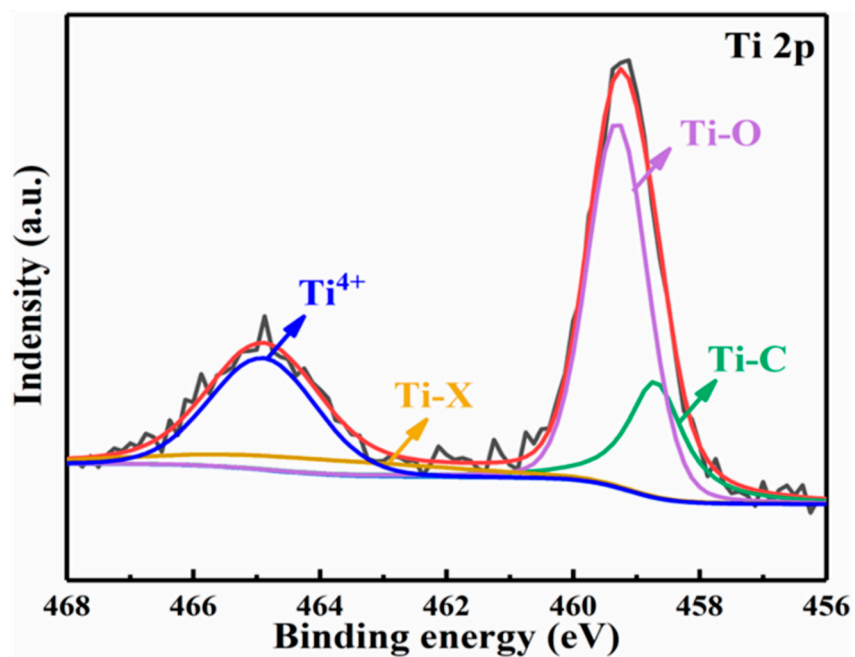

Figure S5. Ti 2p spectra of PANI/MXene.

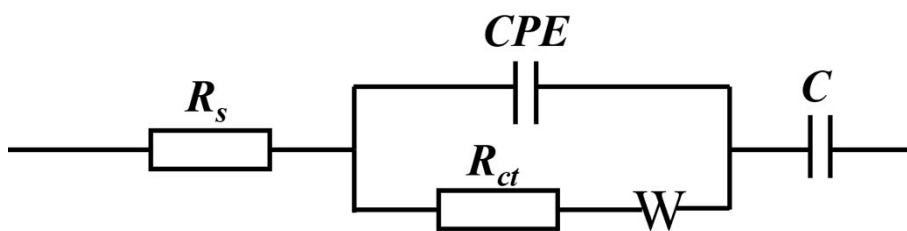

Figure S6. Equivalent circuits that optimally fit with obtained Nyquist plots of PANI/MXene electrodes.

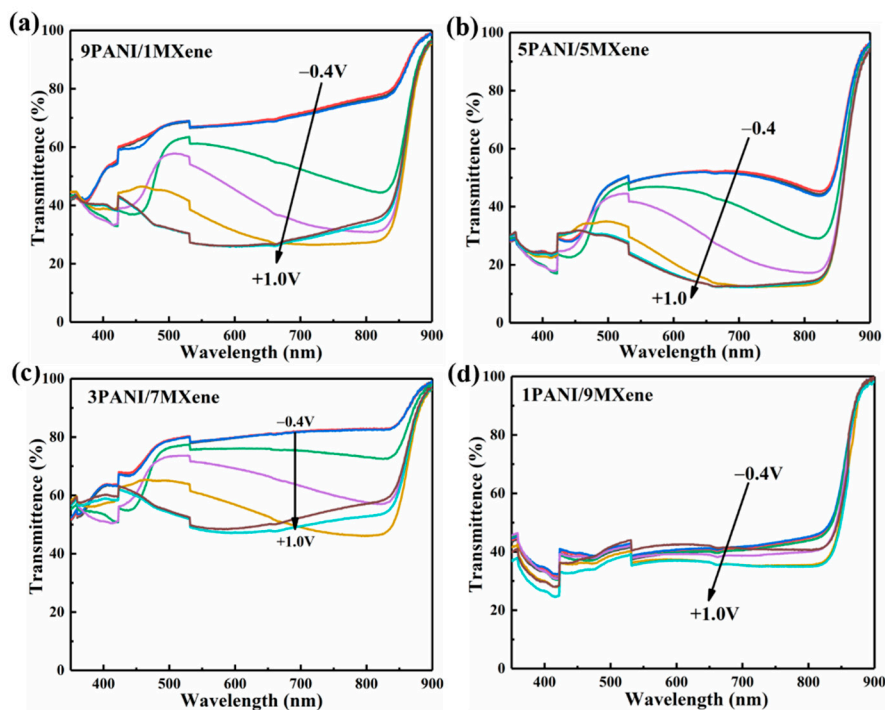

Figure S7. (a)-(d) Comparison of various UV-vis transmittance spectra of PANI/MXene film performed at different mass rates.

**Table S1.** Contribution of oxygen groups resulting from the fitting of N 1s spectrum of MXene/PANI.

| Sample     | Species         | $\lambda$ (nm) | Composition (%) | [=N—/N—] |
|------------|-----------------|----------------|-----------------|----------|
| PANI/MXene | =N-             | 398.9          | 32.68           | 0.72     |
|            | -NH-            | 399.7          | 45.38           |          |
|            | N* <sup>+</sup> | 400.9          | 17.89           |          |
|            | N <sup>+</sup>  | 402.6          | 4.05            |          |

**Table S2.** Electrical parameters for both of pure PANI and the PANI/MXene electrode evaluated from EIS test.

| Sample     | $R_s$ ( $\Omega$ ) | $R_{ct}$ ( $\Omega$ ) | $W$ ( $\Omega \cdot s^{-0.5}$ ) |
|------------|--------------------|-----------------------|---------------------------------|
| Pure PANI  | 4.126              | 3.099                 | 6.411                           |
| PANI/MXene | 2.501              | 0.860                 | 3.911                           |
